# Supplementary material for: Multi-model ensembles for assessment of flood losses and associated uncertainty
Source: Copernicus journal article supplement (doi:10.5194/nhess-18-1297-2018), 2018-05-03
Supplement: Supplementary file 1 [file nhess-18-1297-2018-supplement.zip]

Archive with 3 entries (3 files):
- mulde_losses.csv
- nhess-18-1297-2018-supplement-title-page.pdf
- caldogno_losses.csv
