# Supplementary material for: Multi-model ensembles for assessment of flood losses and associated uncertainty
Source: Copernicus journal article supplement (doi:10.5194/nhess-18-1297-2018), 2018-05-03
Supplement: Supplementary file 1 [file nhess-18-1297-2018-supplement.zip › caldogno_losses.csv]

bldg_id	rep_loss	1_ICPR	2_HWS-GIS	3_FLEMO	4_IKSE	6_MERK	12_Yazdi&Neysh	16_HAZUS-MH	17_MCM	20_TYROL	21_Pistrika&Jo	23_Luino	24_Riha&Marcik	27_Toth	31_Vojinovic	37_Budiyono	42_Dutta	44_DSM	45_Vanneuville	46_HOWAS	47_ANUFlood
10001	4728	2385.6	12868.6	16300	21840	4200	34864	19096.8	17275.4	7330.6	95822.5	26800	8558.3	15120	9559.8	12240	25320	25200	2720	7410.4	5998.1
10002	17538.8	6562.5	21736.7	30350	41250	9375	68000	39666.7	20557.6	9795.9	124458.5	50000	19886.1	26250	12690	75000	50625	47500	8750	9902.6	10050.4
10003	13516.2	1404	9737.7	14670	14040	2700	24984	21600	15750.3	6195.5	84278.1	19800	5419.8	9720	8460	3240	17820	16200	720	6262.9	4533.2
10004	17896	1404	9737.7	14670	14040	2700	24984	21600	15750.3	6195.5	84278.1	19800	5419.8	9720	8460	3240	17820	16200	720	6262.9	4533.2
10005	12928	6156	17216.3	21852	33480	8100	56952	30300	21552.1	10730.9	86382	41400	17489	20520	13536	64800	42660	38520	7920	10847.7	11905.4
10006	50073	5975.5	17636.8	23066	34010	8075	57304	30400	21220.6	10428.5	93711.9	41800	17332.9	21090	13324.5	64600	42845	39140	7790	10542.1	11287.1
10007	1386	5472	17086.3	29773	32680	7600	54492	31413.3	20889.1	10117.2	90387.4	39900	16217.2	20520	13113	60800	40660	37620	7220	10227.3	10668.8
10008	5946	5760	17985.6	24280	34400	8000	57360	33066.7	20889.1	10117.2	95576.9	42000	17070.7	21600	13113	64000	42800	39600	7600	10227.3	10668.8
10009	540	7866	21998.6	27922	42780	10350	72772	41093.3	21552.1	10730.9	110648.9	52900	22347.1	26220	13536	82800	54510	49220	10120	10847.7	11905.4
10010	5650	5975.5	17636.8	29773	34010	8075	57304	32680	21220.6	10428.5	92046	41800	17332.9	21090	13324.5	64600	42845	39140	7790	10542.1	11287.1
10011	4689.4	4300.7	15155.8	21937	28550.6	6324.5	46476	24394.5	20226.1	9463.8	87375.5	34333	13335.4	18431.4	12267	46620.6	34513.7	32887.4	5782.4	9566.8	9432.1
10012	16175	960	8788.3	11140	10400	2500	21840	23333.3	11977.3	5058.6	93577.8	18000	3964	7200	6768	0	15200	12000	0	5113.7	3312.4
10013	57252	6156	17216.3	21852	33480	8100	56952	32160	21552.1	10730.9	89725.9	41400	17489	20520	13536	64800	42660	38520	7920	10847.7	11905.4
10014	8889.8	6336	13351.8	31944	25440	7200	48624	35845.2	24606.5	12391	58504	31440	16092.3	24480	14805	58560	34800	30480	7920	12525.9	15615.4
10015	9228.6	7920	16689.7	39930	31800	9000	60780	29806.5	24606.5	12391	75756.7	39300	20115.4	18900	14805	73200	43500	38100	9900	12525.9	15615.4
10016	5375.2	9568	18571	42592	34880	10400	68352	32853.3	25550.6	12896.9	83497.6	42880	23507.6	20640	14805	84800	48800	42560	11520	13037.3	16852.1
10017	16222	10080	18106.6	51495	33600	10500	66240	31800	26494.7	13383.8	78531.7	41100	23999.3	19800	14805	85500	48000	41700	11400	13529.5	18088.8
10018	13997	9568	18571	42592	34880	10400	68352	32853.3	25550.6	12896.9	84351.9	42880	23507.6	20640	14805	84800	48800	42560	11520	13037.3	16852.1
10019	40000	7875	15916.4	37268	30100	8750	58800	28280	25078.5	12646.5	73893.3	37100	19667.3	17850	14805	71400	41650	36400	9800	12784.2	16233.8
10020	42895	5472	15303.4	19424	29760	7200	50624	28586.7	21552.1	10730.9	81832.2	36800	15545.8	18240	13536	57600	37920	34240	7040	10847.7	11905.4
10021	273925.4	5760	17985.6	24280	34400	8000	57360	33066.7	20889.1	10117.2	102318.8	42000	17070.7	21600	13113	64000	42800	39600	7600	10227.3	10668.8
10022	34838.4	10560	22253	53240	42400	12000	81040	39741.9	24606.5	12391	108434.8	52400	26820.5	25200	14805	97600	58000	50800	13200	12525.9	15615.4
10023	41717.2	9240	21255.6	53240	41200	11000	75120	38451.6	23588.3	11863.4	101857	51200	24307.2	24600	14382	88800	55000	48400	11600	11992.6	14378.8
10024	18624	4608	14388.5	19424	27520	6400	45888	26453.3	20889.1	10117.2	76868.9	33600	13656.6	17280	13113	51200	34240	31680	6080	10227.3	10668.8
10025	49508	4442.9	14199.4	19424	27072	6240	44940.8	26026.7	20756.5	9989.9	76697.6	32960	13283.6	17088	12943.8	49920	33504	31168	5888	10098.7	10421.4
10026	23892.6	3456	13933	21852	25920	5400	40968	25083.9	19563.1	8761.7	87078.4	30600	11249.5	17280	11421	31320	30240	29880	4680	8857.1	8195.4
10027	13000	4462.5	14780.9	20638	28050	6375	46240	26973.3	20557.6	9795.9	83123.1	34000	13522.6	17850	12690	51000	34425	32300	5950	9902.6	10050.4
10028	32232.1	4725	15650.4	21852	29700	6750	48960	28560	20557.6	9795.9	88547	36000	14318	18900	12690	54000	36450	34200	6300	9902.6	10050.4
10029	9759.6	6156	17216.3	21852	33480	8100	56952	32160	21552.1	10730.9	89804.4	41400	17489	20520	13536	64800	42660	38520	7920	10847.7	11905.4
10030	16500	4856.2	16085.1	22459	30525	6937.5	50320	29353.3	20557.6	9795.9	90387	37000	14715.7	19425	12690	55500	37462.5	35150	6475	9902.6	10050.4
10031	1000	2081.2	11438.4	14670	19188	3690	30844.8	22877.4	17148.3	7242.8	84896.3	23760	7509.7	13284	9432.9	10368	22374	22140	2304	7321.7	5876
10032	1800	1849.9	10167.5	16816	17056	3280	27417.6	20335.5	17148.3	7242.8	74700.6	21120	6675.3	11808	9432.9	9216	19888	19680	2048	7321.7	5876
10033	24472.8	2081.2	11438.4	14670	19188	3690	30844.8	22877.4	17148.3	7242.8	85367.3	23760	7509.7	13284	9432.9	10368	22374	22140	2304	7321.7	5876
10034	13264	2081.2	11438.4	14670	19188	3690	30844.8	22877.4	17148.3	7242.8	84421.5	23760	7509.7	13284	9432.9	10368	22374	22140	2304	7321.7	5876
10035	713.8	2081.2	11438.4	14670	19188	3690	30844.8	22877.4	17148.3	7242.8	83719.2	23760	7509.7	13284	9432.9	10368	22374	22140	2304	7321.7	5876
10036	27570	2240	12548.3	21020	20800	4000	33680	25290.3	17021.2	7153.9	95008.6	26000	8130.5	14400	9306	10800	24400	24000	2400	7231.8	5753.9
10037	6120	2312.4	12709.4	16300	21320	4100	34272	25419.4	17148.3	7242.8	92469.6	26400	8344.1	14760	9432.9	11520	24860	24600	2560	7321.7	5876
10038	10365.8	2081.2	11438.4	14670	19188	3690	30844.8	22877.4	17148.3	7242.8	83076.8	23760	7509.7	13284	9432.9	10368	22374	22140	2304	7321.7	5876
10039	18201	6937.2	38128.1	48900	63960	12300	102816	76258.1	17148.3	7242.8	276661.4	79200	25032.4	44280	9432.9	34560	74580	73800	7680	7321.7	5876
10040	22075.6	1965.5	10802.9	13855	18122	3485	29131.2	21606.5	17148.3	7242.8	78599.2	22440	7092.5	12546	9432.9	9792	21131	20910	2176	7321.7	5876
10041	20200	1734.3	9532	12225	15990	3075	25704	19064.5	17148.3	7242.8	69570.3	19800	6258.1	11070	9432.9	8640	18645	18450	1920	7321.7	5876
10042	6411.9	1849.9	10167.5	13040	17056	3280	27417.6	20335.5	17148.3	7242.8	74562.5	21120	6675.3	11808	9432.9	9216	19888	19680	2048	7321.7	5876
10043	3504	1958.4	11884.5	16300	18720	3600	31312	24774.2	16512.9	6786.8	94011.9	24400	7281	12960	8967.6	7920	22560	21600	1760	6860.7	5265.6
10044	13264	5472	17086.3	23066	32680	7600	54492	31413.3	20889.1	10117.2	92089.3	39900	16217.2	20520	13113	60800	40660	37620	7220	10227.3	10668.8
10045	8986	1958.4	11884.5	16300	18720	3600	31312	24774.2	16512.9	6786.8	93891.3	24400	7281	12960	8967.6	7920	22560	21600	1760	6860.7	5265.6
10046	53078	2230.4	13258.9	17930	21164	4070	35094.4	27393.5	16640	6880.4	104211.8	27280	8241.9	14652	9052.2	9504	25322	24420	2112	6955.3	5387.7
10047	20520	2027.6	12053.5	16300	19240	3700	31904	24903.2	16640	6880.4	93960.5	24800	7492.6	13320	9052.2	8640	23020	22200	1920	6955.3	5387.7
10048	18133.3	2027.6	12053.5	16300	19240	3700	31904	24903.2	16640	6880.4	93833.2	24800	7492.6	13320	9052.2	8640	23020	22200	1920	6955.3	5387.7
10049	10273	2027.6	12053.5	16300	19240	3700	31904	24903.2	16640	6880.4	92748.1	24800	7492.6	13320	9052.2	8640	23020	22200	1920	6955.3	5387.7
10050	8279.5	1234.4	9224.6	14670	12636	2430	23385.6	21420	14618.4	5877.5	82893.9	18720	4859.4	8748	7952.4	1296	16578	14580	288	5941.5	4167
10051	11000	189	3908.7	7776	2340	2250	11664	20100	3040.3	2529.3	82385.8	10800	874.8	1620	5499	0	7470	2700	0	2556.8	1549
10052	15946.2	2464	13803.2	17930	22880	4400	37048	27819.4	17021.2	7153.9	102143.2	28600	8943.6	15840	9306	11880	26840	26400	2640	7231.8	5753.9
10053	19386	9240	21255.6	53240	41200	11000	75120	38451.6	23588.3	11863.4	102376.3	51200	24307.2	24600	14382	88800	55000	48400	11600	11992.6	14378.8
10054	14581	2937.6	17826.7	24450	28080	5400	46968	37161.3	16512.9	6786.8	139152.4	36600	10921.5	19440	8967.6	11880	33840	32400	2640	6860.7	5265.6
10055	9700	3354	23262.4	45193	33540	6450	59684	51600	15750.3	6195.5	198541	47300	12947.3	23220	8460	7740	42570	38700	1720	6262.9	4533.2
10056	3264	1370.9	8319.1	14714	13104	2520	21918.4	17341.9	16512.9	6786.8	64898.2	17080	5096.7	9072	8967.6	5544	15792	15120	1232	6860.7	5265.6
10057	28269.6	1370.9	8319.1	14714	13104	2520	21918.4	17341.9	16512.9	6786.8	64637.4	17080	5096.7	9072	8967.6	5544	15792	15120	1232	6860.7	5265.6
10058	23448.4	3133.4	19015.1	33632	29952	5760	50099.2	39638.7	16512.9	6786.8	147392.7	39040	11649.6	20736	8967.6	12672	36096	34560	2816	6860.7	5265.6
10059	1430	1190.4	9648.5	16300	12480	2500	24208	23600	13486.5	5541.4	92349.1	19600	4781.1	8640	7444.8	0	17040	14400	0	5601.7	3800.7
10060	12800	2340	16229.6	24450	23400	11700	41640	42000	15750.3	6195.5	139013.8	33000	9033	16200	8460	5400	29700	27000	1200	2468.7	4533.2
10061	29920	14930.2	32004.1	77251.2	61174.2	25827.8	115871.1	87715.3	24402.8	12287.3	140151.4	75684.2	38181.3	36391.1	14720.4	139063.8	83287.4	73014.3	18688.9	4896.1	15368.1
10062	6916.7	8316	19130	47916	37080	11340	67608	51619.4	23588.3	11863.4	97804.4	46080	21876.4	22140	14382	79920	49500	43560	10440	4727.2	14378.8
10063	39414.4	1890	11713.2	16300	18200	9500	30720	43612.9	16385.8	6691.9	93660.8	24000	7069.9	12600	8883	7200	22100	21000	1600	2666.5	5143.6
10064	54866.7	18800	47508.7	73602	94000	23500	162620	82629	15429.4	11311.4	223352.5	117500	51334.3	56400	13959	188000	122200	108100	23500	11434.5	13142.1
10065	26821.9	7192	18174.6	28156.7	35960	8990	62210.8	31610	15429.4	11311.4	91139.3	44950	19638.1	21576	13959	71920	46748	41354	8990	11434.5	13142.1
10066	3701.3	6400	16173.2	25056	32000	8000	55360	29729	15429.4	11311.4	81102.8	40000	17475.5	19200	13959	64000	41600	36800	8000	11434.5	13142.1
10067	93791.7	8721	24389.8	33073.5	47430	11475	80682	45560	14722.2	10730.9	127443.6	58650	24776.1	29070	13536	91800	60435	54570	11220	10847.7	11905.4
10068	7711.6	10764	20892.4	44262	39240	11700	76896	35640	17431.4	12896.9	94259.7	48240	26446	23220	14805	95400	54900	47880	12960	13037.3	16852.1
10069	46021.4	9890.9	19197.8	25901.6	36057.2	10751	70658.9	32749.2	17431.4	12896.9	88777.2	44327.2	24301	21336.6	14805	87662	50447	43996.4	11908.8	13037.3	16852.1
10070	24709	8936	22581.8	34984.4	44680	11170	77296.4	41509.2	15429.4	11311.4	112712.4	55850	24400.2	26808	13959	89360	58084	51382	11170	11434.5	13142.1
10071	53333.8	24128	37576.3	64206	69600	23200	136416	65296.8	19347.3	14307.9	155245.3	83520	54201	40020	14805	179220	101500	87000	25520	14463.6	19423.3
10072	92686	6900	32391.9	56258	59800	11500	91080	48671	12679.4	7998.3	216813.3	69000	23666.2	41400	10575	41400	66700	69000	9200	8085.4	6974.7
10073	16575.8	7488	23381.3	52962	44720	10400	74568	39433.3	14361.2	10117.2	132932.1	54600	22191.9	28080	13113	83200	55640	51480	9880	10227.3	10668.8
10074	43168.4	7488	23381.3	33722	44720	10400	74568	39433.3	14361.2	10117.2	132932.1	54600	22191.9	28080	13113	83200	55640	51480	9880	10227.3	10668.8
10075	38138.1	11340.9	33472.9	73454.2	64547.4	15325.5	108757	57696	14541.7	10428.5	183723.5	79332	32896	40026.6	13324.5	122604	81315.3	74283.6	14784.6	10542.1	11287.1
10076	77755.5	14835	32638.7	46980	62700	17250	117120	55645.2	16490	12130.1	158406.3	77700	38336.3	37350	14593.5	139800	84750	74400	18600	12262.1	14997.1
10077	51557.6	16800	30177.7	39150	56000	17500	110400	52000	18019.3	13383.8	131219.2	68500	39998.8	33000	14805	142500	80000	69500	19000	13529.5	18088.8
10078	34228.8	9240	21255.6	31320	41200	11000	75120	36451.6	16136.5	11863.4	103766.4	51200	24307.2	24600	14382	88800	55000	48400	11600	11992.6	14378.8
10079	16278	3456	10791.4	15564	20640	4800	34416	19840	14361.2	10117.2	60278.2	25200	10242.4	12960	13113	38400	25680	23760	4560	10227.3	10668.8
10080	32973.6	1207.5	13277.5	14210	13650	4375	33040	22750	6548.7	4380.9	162394.9	28000	5169.6	9450	6133.5	0	22575	15750	0	4428.6	2702
10081	83051.5	11157.1	34838.1	50245.8	66632.8	15496	111106.3	64050.1	14361.2	10117.2	192359.6	81354	33065.9	41839.2	13113	123968	82903.6	76705.2	14721.2	10227.3	10668.8
10082	11201.3	5577	20981.1	33722	39260	8450	63024	37786.7	13819.7	9119.5	127641	46800	17710.2	25740	11844	56160	46670	45240	7540	9218.8	8813.8
10083	12639	2145	8069.6	12970	15100	3250	24240	14533.3	13819.7	9119.5	49325.2	18000	6811.6	9900	11844	21600	17950	17400	2900	9218.8	8813.8
10084	45584.2	9234	25824.5	35019	50220	12150	85428	45450	14722.2	10730.9	135171.5	62100	26233.5	30780	13536	97200	63990	57780	11880	10847.7	11905.4
10085	11761.1	11200	28303.1	43848	56000	14000	96880	49225.8	15429.4	11311.4	140999.7	70000	30582.2	33600	13959	112000	72800	64400	14000	11434.5	13142.1
10086	3700	1988.7	10930	21035.6	18335.2	2115.6	29473.9	16201.3	11815.6	7242.8	81609	22704	7176	12693.6	9432.9	9907.2	21379.6	21156	2201.6	7321.7	5876
10087	7432	2312.4	12709.4	24460	21320	4100	34272	18838.7	11815.6	7242.8	93901.9	26400	8344.1	14760	9432.9	11520	24860	24600	2560	7321.7	5876
10088	9838.2	4421.8	21822.9	39136	39104	7520	60518.4	32619.4	12391.5	7754.7	153244.2	46080	15418.6	27072	10194.3	25344	44192	45120	5632	7839.1	6608.5
10089	2972.4	1566.7	9507.6	19568	14976	1728	25049.6	14038.7	11335.7	6786.8	73631.6	19520	5824.8	10368	8967.6	6336	18048	17280	1408	6860.7	5265.6
10090	10829.6	1676.5	9214.3	17733.5	15457	1783.5	24847.2	13658.1	11815.6	7242.8	67040.5	19140	6049.5	10701	9432.9	8352	18023.5	17835	1856	7321.7	5876
10091	4646.9	3237.4	17793.1	34244	29848	5740	47980.8	26374.2	11815.6	7242.8	129346.4	36960	11681.8	20664	9432.9	16128	34804	34440	3584	7321.7	5876
10092	34662.7	2804.4	17018.6	35026.7	26807	3093.1	44838.8	25129.3	11335.7	6786.8	132130	34940.8	10426.4	18558.7	8967.6	11341.4	32305.9	30931.2	2520.3	6860.7	5265.6
10093	2795	1615.7	9804.7	20179.5	15444	2970	25832.4	14477.4	11335.7	6786.8	76062.4	20130	6006.8	10692	8967.6	6534	18612	17820	1452	6860.7	5265.6
10094	10000	1508	9151	18834.2	14414.4	2772	24110.2	13512.3	11335.7	6786.8	71152.8	18788	5606.4	9979.2	8967.6	6098.4	17371.2	16632	1355.2	6860.7	5265.6
10095	14676	3509.5	21297	43832.3	33546.2	6451.2	56111.1	31446.7	11335.7	6786.8	165471.8	43724.8	13047.6	23224.3	8967.6	14192.6	40427.5	38707.2	3153.9	6860.7	5265.6
10096	42593.6	2307	13999.9	28813.9	22052.2	4240.8	36885.5	29184	11335.7	6786.8	109214.4	28743.2	8577	15266.9	8967.6	9329.8	26575.7	25444.8	2073.3	6860.7	5265.6
10097	2379	2545.9	15449.8	31798	24336	4680	40705.6	22812.9	11335.7	6786.8	120670.7	31720	9465.3	16848	8967.6	10296	29328	28080	2288	6860.7	5265.6
10098	4000	2296.3	13650.6	27701	21789.3	4190.3	36131.3	20165.8	11431.7	6880.4	106117.8	28086	8485.4	15084.9	9052.2	9784.8	26070.1	25141.5	2174.4	6955.3	5387.7
10099	12902.5	232.1	6299.3	23919.4	2928.9	4693.8	22109.4	19901.5	1766.8	1959.2	171851.2	21028	1092.1	2027.7	5499	0	13856	3379.5	0	1980.5	1332
10100	42718.9	936	6491.8	14676	9360	1800	16656	9600	10759.9	6195.5	55437.3	13200	3613.2	6480	8460	2160	11880	10800	480	6262.9	4533.2
10101	42254.7	936	6491.8	14676	9360	1800	16656	9600	10759.9	6195.5	55406.8	13200	3613.2	6480	8460	2160	11880	10800	480	6262.9	4533.2
10102	6672.4	946.4	7072.2	16877.4	9687.6	1863	17929	10626	10047.4	5877.5	63911.9	14352	3725.5	6706.8	7952.4	993.6	12709.8	11178	220.8	5941.5	4167
10103	15929.8	946.4	7072.2	16877.4	9687.6	1863	17929	10626	10047.4	5877.5	63911.9	14352	3725.5	6706.8	7952.4	993.6	12709.8	11178	220.8	5941.5	4167
10104	7410.2	1432.1	14557.8	22932	15912	2700	36115.2	24120	7283.2	4663.8	166077.2	30240	6041.8	11016	6387.3	0	24876	18360	0	4714.6	2946.2
10105	300	3753.3	35527	33698	41002	10375	88179.2	57270	8017.7	4930.5	380710.6	73040	15608.3	28386	6641.1	0	61171	47310	0	4984.2	3190.4
10106	6700	660	9257.9	12180	7800	2250	23880	18000	4712.4	3577	137246.3	21000	2935.1	5400	5499	0	15900	9000	0	3615.9	2091.7
10107	2100	1356.6	12841.1	12180	14820	2250	31872	20700	8017.7	4930.5	138183.2	26400	5641.6	10260	6641.1	0	22110	17100	0	4984.2	3190.4
10108	7177.6	1524.6	13515.7	36690	16380	2250	33648	21300	8622.5	5183.5	138703	27600	6251.3	11340	6937.2	0	23490	18900	0	5239.9	3434.5
10109	32015.5	1697.4	14160.4	36690	17940	2250	35424	21900	9097.5	5424.7	138855.7	28800	6864.2	12420	7275.6	0	24870	20700	0	5483.8	3678.7
10110	187318	12000	30324.7	46980	60000	24000	103800	80225.8	15429.4	11311.4	156000	75000	32766.6	36000	13959	120000	78000	69000	15000	4507.2	13142.1
10111	92920.9	3006.1	16522.2	31798	27716	13130	44553.6	41935.5	11815.6	7242.8	120405.5	34320	10847.4	19188	9432.9	14976	32318	31980	3328	2886	5876
10112	28075.5	806.4	10157.5	12180	9360	11250	25656	38400	5446.9	3918.4	137376.3	22200	3531.2	6480	5752.8	0	17280	10800	0	1561.4	2335.8
10113	31256.4	1356.6	12841.1	12180	14820	11250	31872	39800	8017.7	4930.5	137843.5	26400	5641.6	10260	6641.1	0	22110	17100	0	1964.7	3190.4
10114	19114.4	1113.6	11761.8	12180	12480	11250	29208	39200	6916	4524.5	137770.8	24600	4732.6	8640	6260.4	0	20040	14400	0	1802.9	2824.1
10115	800	1785.6	14472.7	36690	18720	11250	36312	40800	9335	5541.4	139164	29400	7171.7	12960	7444.8	0	25560	21600	0	2208.1	3800.7
10116	5947.9	1785.6	14472.7	36690	18720	11250	36312	40800	9335	5541.4	139164	29400	7171.7	12960	7444.8	0	25560	21600	0	2208.1	3800.7
10117	17457.6	15840	33379.4	46980	63600	27000	121560	91838.7	16843.6	12391	145016.2	78600	40230.8	37800	14805	146400	87000	76200	19800	4937.4	15615.4
10118	18048.8	3360	18822.5	57600	31200	12600	50520	47806.5	11719.6	7153.9	142630.3	39000	12195.8	21600	9306	16200	36600	36000	3600	2850.6	5753.9
10119	29260.1	2880	11610.8	30555	21600	7200	34140	29709.7	13639.2	8761.7	74584.7	25500	9374.5	14400	11421	26100	25200	24900	3900	3491.3	8195.4
10120	32281.8	6840	19129.3	25940	37200	11400	63280	49666.7	14722.2	10730.9	100713	46000	19432.2	22800	13536	72000	47400	42800	8800	4276	11905.4
10121	11413	1274.4	12491	12180	14040	11250	30984	39600	7650.5	4799	137363.4	25800	5337.8	9720	6514.2	0	21420	16200	0	1912.3	3068.3
10122	10271.5	1344	12303.6	11368	14560	10500	30576	37333.3	8385	5058.6	128316.1	25200	5549.7	10080	6768	0	21280	16800	0	2015.7	3312.4
10123	28933	1440	13182.4	12180	15600	11250	32760	40000	8385	5058.6	137700.3	27000	5946.1	10800	6768	0	22800	18000	0	2015.7	3312.4
10124	40186.7	1697.4	14160.4	36690	17940	11250	35424	40600	9097.5	5424.7	137327.6	28800	6864.2	12420	7275.6	0	24870	20700	0	2161.6	3678.7
10125	10038.7	1612.5	13452.4	34855.5	17043	10687.5	33652.8	38570	9097.5	5424.7	130827.2	27360	6521	11799	7275.6	0	23626.5	19665	0	2161.6	3678.7
10126	29123	1562.5	12315.7	30575	16250	9375	31000	34166.7	9572.4	5655.7	114875.4	25000	6233.4	11250	7614	0	21875	18750	0	2253.6	3922.8
10127	17723	1957.8	13578.7	30697.3	19578	9789	34838.8	35140	10759.9	6195.5	116865.6	27610	7557.6	13554	8460	4518	24849	22590	1004	2468.7	4533.2
10128	21882	2057.4	15374.3	36690	21060	11430	38976	41400	10047.4	5877.5	139422	31200	8098.9	14580	7952.4	2160	27630	24300	480	2342	4167
10129	32926	1610.4	13841.6	36690	17160	11250	34536	40400	8860	5305.5	138992	28200	6557.4	11880	7106.4	0	24180	19800	0	2114.1	3556.6
10130	18710.4	1610.4	13841.6	36690	17160	11250	34536	40400	8860	5305.5	138992	28200	6557.4	11880	7106.4	0	24180	19800	0	2114.1	3556.6
10131	2658.7	1035	11380.7	19110	11700	11250	28320	39000	6548.7	4380.9	137386.1	24000	4431.1	8100	6133.5	0	19350	13500	0	1745.7	2702
10132	39778.8	1356.6	12841.1	12180	14820	11250	31872	39800	8017.7	4930.5	137730.8	26400	5641.6	10260	6641.1	0	22110	17100	0	1964.7	3190.4
10133	3804	1356.6	12841.1	12180	14820	11250	31872	39800	8017.7	4930.5	137606.2	26400	5641.6	10260	6641.1	0	22110	17100	0	1964.7	3190.4
10134	3664.4	1356.6	12841.1	12180	14820	11250	31872	39800	8017.7	4930.5	137788.4	26400	5641.6	10260	6641.1	0	22110	17100	0	1964.7	3190.4
10135	16542.2	1356.6	12841.1	12180	14820	11250	31872	39800	8017.7	4930.5	137788.4	26400	5641.6	10260	6641.1	0	22110	17100	0	1964.7	3190.4
10136	21501.5	4145.4	20458.9	57600	36660	16050	56736	51871	12391.5	7754.7	144002.7	43200	14454.9	25380	10194.3	23760	41430	42300	5280	3090	6608.5
10137	55435.4	1035	11380.7	12180	11700	11250	28320	39000	6548.7	4380.9	138153.2	24000	4431.1	8100	6133.5	0	19350	13500	0	1745.7	2702
10138	32739.2	13860	31883.4	46980	61800	18900	112680	86032.3	16136.5	11863.4	151494.5	76800	36460.7	36900	14382	133200	82500	72600	17400	4727.2	14378.8
10139	7758	550	7714.9	11400	6500	3125	19900	15000	4594.4	3577	114705.5	17500	2445.9	4500	5499	0	13250	7500	0	3615.9	2091.7
10140	42349.8	7200	22482	35300	43000	10000	71700	41333.3	13522.4	10117.2	125839.4	52500	21338.4	27000	13113	80000	53500	49500	9500	10227.3	10668.8
10141	29924.4	7200	22482	31800	43000	10000	71700	41333.3	13522.4	10117.2	125839.4	52500	21338.4	27000	13113	80000	53500	49500	9500	10227.3	10668.8
10142	17247	4800	19351.3	35300	36000	7500	56900	34838.7	12914.5	8761.7	122416.8	42500	15624.2	24000	11421	43500	42000	41500	6500	8857.1	8195.4
10143	11561	3262.5	16669.8	23900	29250	5625	45800	32419.4	11542.7	7587.9	118871.2	35000	11504.7	20250	9940.5	18000	33375	33750	4000	7670.5	6364.3
10144	27612.8	3262.5	16669.8	23900	29250	5625	45800	32419.4	11542.7	7587.9	118871.2	35000	11504.7	20250	9940.5	18000	33375	33750	4000	7670.5	6364.3
10145	17713.2	3074.5	16282.5	23900	27950	5375	44320	32096.8	11359.8	7417.3	116690.5	34000	10966.2	19350	9686.7	16200	32225	32250	3600	7498.1	6120.2
10146	18570	3074.5	16282.5	23900	27950	5375	44320	32096.8	11359.8	7417.3	116690.5	34000	10966.2	19350	9686.7	16200	32225	32250	3600	7498.1	6120.2
10147	38537.1	3750	17604.3	23900	32500	6250	49500	33225.8	12000	7998.3	120191.5	37500	12862.1	22500	10575	22500	36250	37500	5000	8085.4	6974.7
10148	21260.6	3750	17604.3	23900	32500	6250	49500	33225.8	12000	7998.3	120191.5	37500	12862.1	22500	10575	22500	36250	37500	5000	8085.4	6974.7
10149	9927	5362.5	20174.1	31800	37750	8125	60600	36333.3	13066.4	9119.5	122205.3	45000	17029	24750	11844	54000	44875	43500	7250	9218.8	8813.8
10150	27620.4	4800	19351.3	31800	36000	7500	56900	34838.7	12914.5	8761.7	121235.5	42500	15624.2	24000	11421	43500	42000	41500	6500	8857.1	8195.4
10151	17685.2	3750	17604.3	23900	32500	6250	49500	33225.8	12000	7998.3	120131.6	37500	12862.1	22500	10575	22500	36250	37500	5000	8085.4	6974.7
10152	8660.8	3750	17604.3	23900	32500	6250	49500	33225.8	12000	7998.3	120191.5	37500	12862.1	22500	10575	22500	36250	37500	5000	8085.4	6974.7
10153	38138	5950	20968.2	31800	39500	8750	64300	38000	13218.4	9463.8	124163.3	47500	18449.7	25500	12267	64500	47750	45500	8000	9566.8	9432.1
10154	22775	5950	20968.2	31800	39500	8750	64300	38000	13218.4	9463.8	124086.9	47500	18449.7	25500	12267	64500	47750	45500	8000	9566.8	9432.1
10155	9500	3750	17604.3	23900	32500	6250	49500	33225.8	12000	7998.3	120602.5	37500	12862.1	22500	10575	22500	36250	37500	5000	8085.4	6974.7
10156	48430.8	3750	17604.3	23900	32500	6250	49500	33225.8	12000	7998.3	120369.4	37500	12862.1	22500	10575	22500	36250	37500	5000	8085.4	6974.7
10157	8923.3	862.5	9483.9	10250	9750	3125	23600	16250	6301.2	4380.9	115461.1	20000	3692.6	6750	6133.5	0	16125	11250	0	4428.6	2702
10158	7218	1562.5	12315.7	23900	16250	3125	31000	18750	9089.5	5655.7	116231.7	25000	6233.4	11250	7614	0	21875	18750	0	5717.2	3922.8
10159	22171.5	2362.5	14641.5	26550	22750	4375	38400	21612.9	10628.2	6691.9	116758.3	30000	8837.4	15750	8883	9000	27625	26250	2000	6764.7	5143.6
10160	8295.4	2362.5	14641.5	23900	22750	4375	38400	21612.9	10628.2	6691.9	115306.7	30000	8837.4	15750	8883	9000	27625	26250	2000	6764.7	5143.6
10161	15712.2	2362.5	14641.5	23900	22750	4375	38400	21612.9	10628.2	6691.9	115218.4	30000	8837.4	15750	8883	9000	27625	26250	2000	6764.7	5143.6
10162	9640.5	2362.5	14641.5	26550	22750	4375	38400	30806.5	10628.2	6691.9	114921.6	30000	8837.4	15750	8883	9000	27625	26250	2000	6764.7	5143.6
10163	13004.4	2362.5	14641.5	23900	22750	4375	38400	30806.5	10628.2	6691.9	115391.4	30000	8837.4	15750	8883	9000	27625	26250	2000	6764.7	5143.6
10164	60202.8	1950	13524.6	23900	19500	11250	34700	35000	10170.9	6195.5	115365.5	27500	7527.5	13500	8460	4500	24750	22500	1000	2468.7	4533.2
10165	33321.2	1950	13524.6	23900	19500	11250	34700	35000	10170.9	6195.5	116305.1	27500	7527.5	13500	8460	4500	24750	22500	1000	2468.7	4533.2
10166	15638.2	1714.5	12811.9	23900	17550	9525	32480	34500	9522.1	5877.5	115922.3	26000	6749.1	12150	7952.4	1800	23025	20250	400	2342	4167
10167	65316	2362.5	14641.5	23900	22750	11875	38400	37419.4	10628.2	6691.9	115773.8	30000	8837.4	15750	8883	9000	27625	26250	2000	2666.5	5143.6
10168	48274.8	2362.5	14641.5	23900	22750	11875	38400	37419.4	10628.2	6691.9	115627.6	30000	8837.4	15750	8883	9000	27625	26250	2000	2666.5	5143.6
10169	23074.9	2278	14424.4	26550	22100	11750	37660	36935.5	10536.7	6595.6	117563.5	29500	8574.1	15300	8798.4	8100	27050	25500	1800	2628.2	5021.5
10170	13911.2	2278	14424.4	26550	22100	11750	37660	36935.5	10536.7	6595.6	117785.4	29500	8574.1	15300	8798.4	8100	27050	25500	1800	2628.2	5021.5
10171	10864.5	2362.5	14641.5	23900	22750	11875	38400	37419.4	10628.2	6691.9	118696.8	30000	8837.4	15750	8883	9000	27625	26250	2000	2666.5	5143.6
10172	33853.9	7200	22482	31800	43000	10000	71700	41333.3	13522.4	10117.2	123467.1	52500	21338.4	27000	13113	80000	53500	49500	9500	10227.3	10668.8
10173	23000	7200	22482	31800	43000	10000	71700	41333.3	13522.4	10117.2	119730.4	52500	21338.4	27000	13113	80000	53500	49500	9500	10227.3	10668.8
10174	14121.3	3262.5	16669.8	23900	29250	13125	45800	42258.1	11542.7	7587.9	121429.9	35000	11504.7	20250	9940.5	18000	33375	33750	4000	3023.6	6364.3
10175	16702.7	3262.5	16669.8	23900	29250	13125	45800	42258.1	11542.7	7587.9	121244.5	35000	11504.7	20250	9940.5	18000	33375	33750	4000	3023.6	6364.3
10176	6726	6562.5	21736.7	31800	41250	16875	68000	55833.3	13370.4	9795.9	123604.8	50000	19886.1	26250	12690	75000	50625	47500	8750	3903.4	10050.4
10177	22200	7200	22482	31800	43000	17500	71700	57916.7	13522.4	10117.2	125049.9	52500	21338.4	27000	13113	80000	53500	49500	9500	4031.4	10668.8
10178	32761.7	3262.5	16669.8	23900	29250	13125	45800	42258.1	11542.7	7587.9	119651	35000	11504.7	20250	9940.5	18000	33375	33750	4000	3023.6	6364.3
10179	24112.1	3262.5	16669.8	23900	29250	13125	45800	42258.1	11542.7	7587.9	119651	35000	11504.7	20250	9940.5	18000	33375	33750	4000	3023.6	6364.3
10180	83784.8	2362.5	14641.5	23900	22750	11875	38400	37419.4	10628.2	6691.9	119653.8	30000	8837.4	15750	8883	9000	27625	26250	2000	2666.5	5143.6
10181	59772.4	2362.5	14641.5	23900	22750	11875	38400	37419.4	10628.2	6691.9	119690.1	30000	8837.4	15750	8883	9000	27625	26250	2000	2666.5	5143.6
10182	32140.6	2800	15685.4	23900	26000	10500	42100	39838.7	11085.4	7153.9	120550	32500	10163.1	18000	9306	13500	30500	30000	3000	2850.6	5753.9
10183	34081.8	2800	15685.4	23900	26000	10500	42100	39838.7	11085.4	7153.9	120550	32500	10163.1	18000	9306	13500	30500	30000	3000	2850.6	5753.9
10184	15438	2890.5	15886.7	23900	26650	12625	42840	40322.6	11176.9	7242.8	115863.8	33000	10430.2	18450	9432.9	14400	31075	30750	3200	2886	5876
10185	5967.9	2890.5	15886.7	23900	26650	12625	42840	40322.6	11176.9	7242.8	116117.4	33000	10430.2	18450	9432.9	14400	31075	30750	3200	2886	5876
10186	16283.9	2534.5	15066.9	23900	24050	12125	39880	38387.1	10811.1	6880.4	116478.7	31000	9365.8	16650	9052.2	10800	28775	27750	2400	2741.7	5387.7
10187	17042.6	2534.5	15066.9	23900	24050	10275	39880	38387.1	10811.1	6880.4	116603.6	31000	9365.8	16650	9052.2	10800	28775	27750	2400	2741.7	5387.7
10188	10923	2982	16085.7	23900	27300	10650	43580	40806.5	11268.4	7330.6	116921.7	33500	10697.9	18900	9559.8	15300	31650	31500	3400	2921	5998.1
10189	19508	2982	16085.7	23900	27300	10650	43580	40806.5	11268.4	7330.6	116921.7	33500	10697.9	18900	9559.8	15300	31650	31500	3400	2921	5998.1
10190	27813.8	3750	17604.3	23900	32500	13750	49500	44677.4	12000	7998.3	118853.3	37500	12862.1	22500	10575	22500	36250	37500	5000	3187.1	6974.7
10191	10199.6	3750	17604.3	23900	32500	13750	49500	44677.4	12000	7998.3	118853.3	37500	12862.1	22500	10575	22500	36250	37500	5000	3187.1	6974.7
10192	30000	1200	10985.4	10250	13000	10625	27300	50833.3	8008	5058.6	115276.3	22500	4955.1	9000	6768	0	19000	15000	0	2015.7	3312.4
10193	33225	1200	10985.4	10250	13000	10625	27300	50833.3	8008	5058.6	115775.5	22500	4955.1	9000	6768	0	19000	15000	0	2015.7	3312.4
10194	7932	1950	13524.6	23900	19500	11250	34700	35000	10170.9	6195.5	115899.2	27500	7527.5	13500	8460	4500	24750	22500	1000	2468.7	4533.2
10195	9400	2362.5	14641.5	23900	22750	10125	38400	37419.4	10628.2	6691.9	117177.7	30000	8837.4	15750	8883	9000	27625	26250	2000	2666.5	5143.6
10196	9941.3	550	7714.9	10250	6500	10625	19900	31666.7	4594.4	3577	114500.1	17500	2445.9	4500	5499	0	13250	7500	0	1425.3	2091.7
10197	21660.1	550	7714.9	10250	6500	10625	19900	31666.7	4594.4	3577	114526.7	17500	2445.9	4500	5499	0	13250	7500	0	1425.3	2091.7
10198	16700	4800	19351.3	31800	36000	7500	56900	34838.7	12914.5	8761.7	122349.9	42500	15624.2	24000	11421	43500	42000	41500	6500	8857.1	8195.4
10199	12625	4800	19351.3	31800	36000	7500	56900	34838.7	12914.5	8761.7	122349.9	42500	15624.2	24000	11421	43500	42000	41500	6500	8857.1	8195.4
10200	16010	6562.5	21736.7	31800	41250	9375	68000	39666.7	13370.4	9795.9	125355.9	50000	19886.1	26250	12690	75000	50625	47500	8750	9902.6	10050.4
10201	11759.6	8550	23911.6	31800	46500	11250	79100	44666.7	13826.3	10730.9	125475.8	57500	24290.3	28500	13536	90000	59250	53500	11000	10847.7	11905.4
10202	11239	10000	25270.6	53075	50000	12500	86500	46451.6	14511.3	11311.4	126723.1	62500	27305.5	30000	13959	1e+05	65000	57500	12500	11434.5	13142.1
10203	28040	994.5	10109.6	10250	11050	9375	25080	32833.3	6983.9	4663.8	115468.3	21000	4195.7	7650	6387.3	0	17275	12750	0	1858.4	2946.2
10204	35161.6	994.5	10109.6	10250	11050	9375	25080	32833.3	6983.9	4663.8	115468.3	21000	4195.7	7650	6387.3	0	17275	12750	0	1858.4	2946.2
10205	559	550	7714.9	11400	6500	3125	19900	28333.3	4594.4	3577	114817.6	17500	2445.9	4500	5499	0	13250	7500	0	3615.9	2091.7
10206	13152.1	1488	12060.6	23900	15600	9375	30260	34000	8873.2	5541.4	115970	24500	5976.4	10800	7444.8	0	21300	18000	0	2208.1	3800.7
10207	9535.2	1488	12060.6	23900	15600	9375	30260	34000	8873.2	5541.4	115816.3	24500	5976.4	10800	7444.8	0	21300	18000	0	2208.1	3800.7
10208	30688.9	1488	12060.6	23900	15600	9375	30260	34000	8873.2	5541.4	115816.3	24500	5976.4	10800	7444.8	0	21300	18000	0	2208.1	3800.7
10209	8774	19136	37142	85184	69760	20800	136704	65706.7	25550.6	12896.9	166409.1	85760	47015.2	41280	14805	169600	97600	85120	23040	13037.3	16852.1
10210	16011.5	10080	31474.8	54845	60200	14000	100380	53083.3	20889.1	10117.2	171881.5	73500	29873.7	37800	13113	112000	74900	69300	13300	10227.3	10668.8
10211	15288	5250	24646	36785	45500	8750	69300	46516.1	18292.2	7998.3	166956.6	52500	18006.9	31500	10575	31500	50750	52500	7000	8085.4	6974.7
10212	7784.4	2000	15764.2	33632	20800	4000	39680	37866.7	13863.8	5655.7	148167.5	32000	7978.7	14400	7614	0	28000	24000	0	5717.2	3922.8
10213	8547.6	2730	18934.5	36785	27300	5250	48580	42000	15750.3	6195.5	163759.1	38500	10538.5	18900	8460	6300	34650	31500	1400	6262.9	4533.2
10214	10995	10944	30606.8	50144	59520	14400	101248	57173.3	21552.1	10730.9	153375	73600	31091.6	36480	13536	115200	75840	68480	14080	10847.7	11905.4
10215	79225.2	7616	26839.3	50144	50560	11200	82304	48640	20226.1	9463.8	152233.8	60800	23615.6	32640	12267	82560	61120	58240	10240	9566.8	9432.1
10216	91116.6	16896	35604.7	109856	67840	19200	129664	63587.1	24606.5	12391	172747.5	83840	42912.8	40320	14805	156160	92800	81280	21120	12525.9	15615.4
10217	18637.4	20160	36213.2	79860	67200	21000	132480	63600	26494.7	13383.8	161256.6	82200	47998.6	39600	14805	171000	96000	83400	22800	13529.5	18088.8
10218	33967.1	21315	36892.9	79860	68100	21750	134640	64600	26966.7	13620.7	158803.2	83100	49988	40050	14805	177000	98250	85200	23400	13769	18707.1
10219	17379.6	6864	25822.9	38848	48320	10400	77568	46506.7	19894.6	9119.5	156617.6	57600	21797.2	31680	11844	69120	57440	55680	9280	9218.8	8813.8
10220	157116	2886	20016.5	38887	28860	5550	51356	44400	15750.3	6195.5	173763.6	40700	11140.7	19980	8460	6660	36630	33300	1480	6262.9	4533.2
10221	38145	3920	21959.6	36785	36400	7000	58940	44258.1	17021.2	7153.9	163418.4	45500	14228.4	25200	9306	18900	42700	42000	4200	7231.8	5753.9
10222	6468	197.8	5368.3	13824	2496	4000	18841.6	58880	2121.1	1959.2	146374.2	17920	930.7	2304	5499	0	11808	2880	0	1980.5	1332
10223	6391	266.2	6207.5	13824	3328	4000	19788.8	17280	2580.7	2262.3	146565.7	18560	1242.6	2304	5499	0	12544	3840	0	2286.9	1440.5
10224	21400	8640	26978.4	36420	51600	12000	86040	49600	20889.1	10117.2	147448.2	63000	25606	32400	13113	96000	64200	59400	11400	10227.3	10668.8
10225	19200	5760	23221.6	36420	43200	9000	68280	41806.5	19563.1	8761.7	145827	51000	18749.1	28800	11421	52200	50400	49800	7800	8857.1	8195.4
10226	10046	6144	24769.7	50144	46080	9600	72832	44593.5	19563.1	8761.7	151501.2	54400	19999	30720	11421	55680	53760	53120	8320	8857.1	8195.4
10227	13036.1	3584	20077.3	26080	33280	6400	53888	40464.5	17021.2	7153.9	150448.8	41600	13008.8	23040	9306	17280	39040	38400	3840	7231.8	5753.9
10228	4603.2	3699.8	20335	26080	34112	6560	54835.2	40671	17148.3	7242.8	148932.9	42240	13350.6	23616	9432.9	18432	39776	39360	4096	7321.7	5876
10229	6886.4	3469.4	19816.6	26080	32448	6240	52940.8	40258.1	16894.2	7063.9	149415.5	40960	12667.8	22464	9221.4	16128	38304	37440	3584	7140.8	5631.9
10230	30554.1	3699.8	20335	26080	34112	6560	54835.2	40671	17148.3	7242.8	149490.4	42240	13350.6	23616	9432.9	18432	39776	39360	4096	7321.7	5876
10231	36953.4	3584	20077.3	26080	33280	6400	53888	40464.5	17021.2	7153.9	149665	41600	13008.8	23040	9306	17280	39040	38400	3840	7231.8	5753.9
10232	7960.4	3699.8	20335	26080	34112	6560	54835.2	40671	17148.3	7242.8	148191.4	42240	13350.6	23616	9432.9	18432	39776	39360	4096	7321.7	5876
10233	1080	3468.6	19064	24450	31980	6150	51408	38129	17148.3	7242.8	139140.6	39600	12516.2	22140	9432.9	17280	37290	36900	3840	7321.7	5876
10234	2800	3468.6	19064	24450	31980	6150	51408	38129	17148.3	7242.8	139804.7	39600	12516.2	22140	9432.9	17280	37290	36900	3840	7321.7	5876
10235	4080	3133.4	19015.1	26080	29952	5760	50099.2	39638.7	16512.9	6786.8	149247.4	39040	11649.6	20736	8967.6	12672	36096	34560	2816	6860.7	5265.6
10236	16968.2	3133.4	19015.1	26080	29952	5760	50099.2	39638.7	16512.9	6786.8	148604.5	39040	11649.6	20736	8967.6	12672	36096	34560	2816	6860.7	5265.6
10237	5000	3133.4	19015.1	26080	29952	5760	50099.2	39638.7	16512.9	6786.8	149171.2	39040	11649.6	20736	8967.6	12672	36096	34560	2816	6860.7	5265.6
10238	16742.4	3133.4	19015.1	26080	29952	5760	50099.2	39638.7	16512.9	6786.8	148517.8	39040	11649.6	20736	8967.6	12672	36096	34560	2816	6860.7	5265.6
10239	4164	3133.4	19015.1	26080	29952	5760	50099.2	39638.7	16512.9	6786.8	148429.2	39040	11649.6	20736	8967.6	12672	36096	34560	2816	6860.7	5265.6
10240	6444	3133.4	19015.1	26080	29952	5760	50099.2	39638.7	16512.9	6786.8	148151.2	39040	11649.6	20736	8967.6	12672	36096	34560	2816	6860.7	5265.6
10241	50067	3244.2	19285.7	26080	30784	5920	51046.4	39845.2	16640	6880.4	150133.1	39680	11988.2	21312	9052.2	13824	36832	35520	3072	6955.3	5387.7
10242	14024	2194.6	16399.3	26080	22464	4320	41574.4	38080	14618.4	5877.5	147104.5	33280	8638.9	15552	7952.4	2304	29472	25920	512	5941.5	4167
10243	5978	2194.6	16399.3	26080	22464	4320	41574.4	38080	14618.4	5877.5	147104.5	33280	8638.9	15552	7952.4	2304	29472	25920	512	5941.5	4167
10244	1300	2194.6	16399.3	26080	22464	4320	41574.4	38080	14618.4	5877.5	147104.5	33280	8638.9	15552	7952.4	2304	29472	25920	512	5941.5	4167
10245	636	2194.6	16399.3	26080	22464	4320	41574.4	38080	14618.4	5877.5	147104.5	33280	8638.9	15552	7952.4	2304	29472	25920	512	5941.5	4167
10246	9165	2194.6	16399.3	26080	22464	4320	41574.4	38080	14618.4	5877.5	147104.5	33280	8638.9	15552	7952.4	2304	29472	25920	512	5941.5	4167
10247	2350	2400.3	17936.7	36785	24570	4725	45472	41650	14618.4	5877.5	161091.3	36400	9448.7	17010	7952.4	2520	32235	28350	560	5941.5	4167
10248	17464.1	3244.2	19285.7	26080	30784	5920	51046.4	72567.7	16640	6880.4	148490	39680	11988.2	28416	9052.2	13824	36832	35520	3072	6955.3	5387.7
10249	96945	9216	28777	38848	55040	12800	91776	52906.7	20889.1	10117.2	158037.9	67200	27313.1	34560	13113	102400	68480	63360	12160	10227.3	10668.8
10250	40000	7616	26839.3	38848	50560	11200	82304	48640	20226.1	9463.8	159507.9	60800	23615.6	32640	12267	82560	61120	58240	10240	9566.8	9432.1
10251	3355	3024	18741.1	26080	29120	5600	49152	71948.4	16385.8	6691.9	152486.5	38400	11311.9	26880	8883	11520	35360	33600	2560	6764.7	5143.6
10252	50281.3	5967.5	25894.7	28525	47950	9625	74480	47645.2	18927.6	8388.7	171021.8	56000	19929.3	32550	10998	46200	54775	55300	8050	8480.1	7585.1
10253	7755.5	4176	21337.3	26080	37440	7200	58624	41496.8	17656.7	7587.9	155895.5	44800	14726	25920	9940.5	23040	42720	43200	5120	7670.5	6364.3
10254	14402.2	3356.2	19552.8	26080	31616	6080	51993.6	40051.6	16767.1	6972.8	152914.6	40320	12327.6	21888	9136.8	14976	37568	36480	3328	7048.7	5509.8
10255	19408.8	3584	20077.3	26080	33280	6400	53888	40464.5	17021.2	7153.9	152506.3	41600	13008.8	23040	9306	17280	39040	38400	3840	7231.8	5753.9
10256	5376	3584	20077.3	26080	33280	6400	53888	40464.5	17021.2	7153.9	153602	41600	13008.8	23040	9306	17280	39040	38400	3840	7231.8	5753.9
10257	60387.6	3024	18741.1	26080	29120	5600	49152	39432.3	16385.8	6691.9	148280.4	38400	11311.9	20160	8883	11520	35360	33600	2560	6764.7	5143.6
10258	24419.9	2496	17311.5	26080	24960	4800	44416	38400	15750.3	6195.5	148992	35200	9635.2	17280	8460	5760	31680	28800	1280	6262.9	4533.2
10259	3508.4	2194.6	16399.3	33632	22464	4320	41574.4	38080	14618.4	5877.5	147814	33280	8638.9	15552	7952.4	2304	29472	25920	512	5941.5	4167
10260	19550.5	2400.3	17936.7	28525	24570	4725	45472	26950	14618.4	5877.5	161595.7	36400	9448.7	17010	7952.4	2520	32235	28350	560	5941.5	4167
10261	64626.2	2083.2	16884.8	36785	21840	4375	42364	41300	13486.5	5541.4	161272.5	34300	8367	15120	7444.8	0	29820	25200	0	5601.7	3800.7
10262	7500	1904.6	15437.6	26080	19968	4000	38732.8	37760	13486.5	5541.4	146829.5	31360	7649.8	13824	7444.8	0	27264	23040	0	5601.7	3800.7
10263	4148.1	1904.6	15437.6	26080	19968	4000	38732.8	37760	13486.5	5541.4	146922.1	31360	7649.8	13824	7444.8	0	27264	23040	0	5601.7	3800.7
10264	1650	479.4	8239.7	13824	5824	13600	22630.4	39893.3	4444.2	2992.7	146779.7	20480	2183	4032	5499	0	14752	6720	0	1192.5	1766.1
10265	31198.1	1187.8	12545.9	17824	13312	13600	31155.2	41813.3	9806.4	4524.5	147542.8	26240	5048.1	9216	6260.4	0	21376	15360	0	1802.9	2824.1
10266	12960	1810.6	15104.4	26080	19136	13600	37785.6	43306.7	13109.2	5424.7	148161.4	30720	7321.8	13248	7275.6	0	26528	22080	0	2161.6	3678.7
10267	13364.7	1536	14061.3	13824	16640	13600	34944	42666.7	11977.3	5058.6	147993.7	28800	6342.5	11520	6768	0	24320	19200	0	2015.7	3312.4
10268	12410.4	3024	18741.1	26080	29120	15200	49152	47896.8	16385.8	6691.9	150178.4	38400	11311.9	20160	8883	11520	35360	33600	2560	2666.5	5143.6
10269	19490	3024	18741.1	26080	29120	15200	49152	47896.8	16385.8	6691.9	150303	38400	11311.9	20160	8883	11520	35360	33600	2560	2666.5	5143.6
10270	67306.7	3935.4	20841.6	26080	35776	16480	56729.6	52851.6	17402.5	7417.3	154331.6	43520	14036.7	24768	9686.7	20736	41248	41280	4608	2955.6	6120.2
10271	21627.3	3935.4	20841.6	26080	35776	16480	56729.6	52851.6	17402.5	7417.3	150270	43520	14036.7	24768	9686.7	20736	41248	41280	4608	2955.6	6120.2
10272	42147.7	3584	20077.3	26080	33280	16000	53888	50993.5	17021.2	7153.9	154091.6	41600	13008.8	23040	9306	17280	39040	38400	3840	2850.6	5753.9
10273	149010	3935.4	20841.6	26080	35776	16480	56729.6	52851.6	17402.5	7417.3	154507	43520	14036.7	24768	9686.7	20736	41248	41280	4608	2955.6	6120.2
10274	43821.2	3935.4	20841.6	26080	35776	16480	56729.6	52851.6	17402.5	7417.3	154737.8	43520	14036.7	24768	9686.7	20736	41248	41280	4608	2955.6	6120.2
10275	19000	1104	12139.4	13824	12480	13600	30208	41600	9263.7	4380.9	147295.5	25600	4726.5	8640	6133.5	0	20640	14400	0	1745.7	2702
10276	2550	1021.4	11719.8	13824	11648	13600	29260.8	41386.7	8721	4232.3	147159.5	24960	4405.7	8064	6006.6	0	19904	13440	0	1686.5	2580
10277	39392.4	1104	12139.4	13824	12480	13600	30208	41600	9263.7	4380.9	146771.2	25600	4726.5	8640	6133.5	0	20640	14400	0	1745.7	2702
10278	98050	1359.4	13323.8	13824	14976	13600	33049.6	42240	10891.9	4799	147044.9	27520	5693.7	10368	6514.2	0	22848	17280	0	1912.3	3068.3
10279	19464.3	1904.6	15437.6	26080	19968	13600	38732.8	43520	13486.5	5541.4	147008.4	31360	7649.8	13824	7444.8	0	27264	23040	0	2208.1	3800.7
10280	41002.9	2194.6	16399.3	26080	22464	13920	41574.4	44160	14618.4	5877.5	148380.5	33280	8638.9	15552	7952.4	2304	29472	25920	512	2342	4167
10281	15480	4176	21337.3	26080	37440	16800	58624	54090.3	17656.7	7587.9	154207.8	44800	14726	25920	9940.5	23040	42720	43200	5120	3023.6	6364.3
10282	26533	3584	20077.3	26080	33280	16000	53888	50993.5	17021.2	7153.9	152262.7	41600	13008.8	23040	9306	17280	39040	38400	3840	2850.6	5753.9
10283	11250	2730	18934.5	36785	27300	15750	48580	73500	15750.3	6195.5	161862.9	38500	10538.5	18900	8460	6300	34650	31500	1400	2468.7	4533.2
10284	71583	9187.5	30431.3	54845	57750	23625	95200	78166.7	20557.6	9795.9	173770.4	70000	27840.6	36750	12690	105000	70875	66500	12250	3903.4	10050.4
10285	52080	10080	31474.8	54845	60200	24500	100380	81083.3	20889.1	10117.2	178724.5	73500	29873.7	37800	13113	112000	74900	69300	13300	4031.4	10668.8
10286	22416.9	3244.2	19285.7	26080	30784	15520	51046.4	49135.5	16640	6880.4	148104.1	39680	11988.2	21312	9052.2	13824	36832	35520	3072	2741.7	5387.7
10287	72734.5	6144	24769.7	38848	46080	19200	72832	63380.6	19563.1	8761.7	156348.7	54400	19999	30720	11421	55680	53760	53120	8320	3491.3	8195.4
10288	136315	16896	35604.7	85184	67840	28800	129664	107767.7	24606.5	12391	163561.4	83840	42912.8	40320	14805	156160	92800	81280	21120	4937.4	15615.4
10289	17560	3244.2	19285.7	26080	30784	15520	51046.4	49135.5	16640	6880.4	147550.3	39680	11988.2	21312	9052.2	13824	36832	35520	3072	2741.7	5387.7
10290	7242.2	3699.8	20335	26080	34112	16160	54835.2	51612.9	17148.3	7242.8	147692	42240	13350.6	23616	9432.9	18432	39776	39360	4096	2886	5876
10291	16354.7	3699.8	20335	26080	34112	16160	54835.2	51612.9	17148.3	7242.8	147552.8	42240	13350.6	23616	9432.9	18432	39776	39360	4096	2886	5876
10292	39942	3699.8	20335	26080	34112	16160	54835.2	51612.9	17148.3	7242.8	152286.4	42240	13350.6	23616	9432.9	18432	39776	39360	4096	2886	5876
10293	46082.4	3699.8	20335	26080	34112	16160	54835.2	51612.9	17148.3	7242.8	151697	42240	13350.6	23616	9432.9	18432	39776	39360	4096	2886	5876
10294	72935	9216	28777	38848	55040	22400	91776	74133.3	20889.1	10117.2	165096.8	67200	27313.1	34560	13113	102400	68480	63360	12160	4031.4	10668.8
10295	16344	1104	12139.4	13824	12480	13600	30208	41600	9263.7	4380.9	146910.8	25600	4726.5	8640	6133.5	0	20640	14400	0	1745.7	2702
10296	38707.9	5250	24646	28525	45500	19250	69300	62548.4	18292.2	7998.3	168434.6	52500	18006.9	31500	10575	31500	50750	52500	7000	3187.1	6974.7
