# Supplementary material for: Multi-model ensembles for assessment of flood losses and associated uncertainty
Source: Copernicus journal article supplement (doi:10.5194/nhess-18-1297-2018), 2018-05-03
Supplement: Supplementary file 1 [file nhess-18-1297-2018-supplement.zip › mulde_losses.csv]

munic	rep_loss	1_ICPR	2_HWS-GIS	3_FLEMO	4_IKSE	6_MERK	12_Yazdi&Neysh	16_HAZUS-MH	17_MCM	20_TYROL	21_Pistrika&Jo	23_Luino	24_Riha&Marcik	27_Toth	31_Vojinovic	37_Budiyono	42_Dutta	44_DSM	45_Vanneuville	46_HOWAS	47_ANUFlood
Bennewitz	20.777	7.574	9.134	16.884	17.18	8.174	32.976	29.495	27.444	7.297	37.735	19.8	24.465	10.739	10.731	35.875	24.298	22.315	9.601	7.611	6.505
Bockelwitz	3.432	0.472	0.778	1.565	1.446	0.666	2.75	2.5	2.483	0.665	3.577	1.748	1.841	0.865	1.076	3.182	2.031	1.777	0.537	0.693	0.626
Doberschuetz	0.57	0.901	1.004	1.751	1.913	0.91	3.685	3.22	3.416	0.905	4.065	2.154	2.769	1.243	1.305	3.801	2.671	2.532	1.223	0.944	0.777
Doebeln	54.532	36.849	27.746	39.893	52.194	26.962	105.528	82.718	26.422	9.904	95.84	55.022	89.237	35.457	13.554	99.839	74.444	78.504	52.554	10.329	8.234
Ebersbach	0.097	0.166	0.09	0.123	0.16	0.095	0.329	0.273	0.265	0.078	0.301	0.156	0.328	0.109	0.087	0.264	0.226	0.315	0.271	0.082	0.053
Eilenburg	77.124	29.371	32.968	53.522	62.373	29.818	121.304	99.35	38.729	14.139	127.577	71.266	92.324	39.366	22.325	133.279	89.249	81.878	37.514	14.747	13.361
Grimma	52.133	7.999	8.902	14.822	16.798	8.067	32.513	28.074	12.824	4.312	36.191	19.148	24.449	10.74	6.468	34.244	23.696	22.272	10.505	4.497	3.839
Grossweitzschen	0.873	0.124	0.195	0.393	0.364	0.168	0.689	0.627	0.535	0.143	0.869	0.439	0.473	0.218	0.228	0.808	0.514	0.449	0.14	0.15	0.136
Jesewitz	0.833	0.178	0.243	0.459	0.455	0.213	0.873	0.785	0.757	0.202	1.022	0.54	0.626	0.279	0.305	0.998	0.65	0.571	0.208	0.211	0.187
Kuehren-Burkartshain	1.91	0.705	0.849	1.527	1.584	0.753	3.041	2.707	2.547	0.683	3.656	1.835	2.201	1.001	1.038	3.242	2.208	2.098	0.919	0.712	0.601
Laussig	4.94	4.24	4.287	7.631	8.114	3.962	15.89	13.821	7.783	2.079	16.577	9.082	12.364	5.269	2.874	16.462	11.532	11.024	5.716	2.168	1.79
Leisnig	4.02	2.505	2.614	4.359	4.909	2.411	9.554	8.32	5.161	1.506	10.868	5.484	7.292	3.218	2.2	9.496	6.849	6.764	3.569	1.571	1.283
Machern	2.213	0.824	0.988	1.933	1.868	0.883	3.63	3.178	2.944	0.796	3.801	2.167	2.726	1.145	1.14	4.182	2.701	2.389	0.984	0.831	0.741
Nerchau	0.179	1.464	0.812	1.107	1.524	0.861	3.143	2.477	2.199	0.703	2.439	1.423	3.036	1.066	0.74	2.57	2.145	2.727	2.371	0.733	0.492
Rosswein	7.17	1.716	2.146	3.786	4.043	1.91	7.757	6.834	4.196	1.221	9.077	4.677	5.644	2.556	1.862	8.312	5.677	5.215	2.21	1.273	1.097
Thallwitz	1.27	2.141	2.697	5.029	5.067	2.405	9.831	8.665	7.489	1.992	11.636	5.854	7.027	3.242	3.015	10.43	7.086	6.59	2.847	2.077	1.773
Trebsen/Mulde	2.247	1.134	1.357	2.31	2.538	1.221	4.839	4.345	3.568	1.029	5.982	2.904	3.546	1.622	1.581	4.91	3.515	3.363	1.536	1.073	0.892
Wurzen	0.924	4.452	4.622	7.36	8.748	4.261	17.191	13.93	4.867	1.787	17.784	9.841	13.302	5.595	2.77	18.315	12.503	11.814	5.948	1.864	1.653
Zschepplin	5.336	0.939	1.643	2.968	3.069	1.383	5.619	5.231	5.903	1.542	8.057	3.674	3.656	1.901	2.599	5.979	4.123	3.797	1.193	1.609	1.358
