# Supplementary material for: Multi-model ensembles for assessment of flood losses and associated uncertainty
Source: Copernicus journal article supplement (doi:10.5194/nhess-18-1297-2018), 2018-05-03
Supplement: Supplementary file 1 [file nhess-18-1297-2018-supplement.zip › nhess-18-1297-2018-supplement-title-page.pdf]

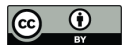

*Supplement of*

## **Multi-model ensembles for assessment of flood losses and associated uncertainty**

**Rui Figueiredo et al.**

*Correspondence to:* Rui Figueiredo ([ruifigueiredo@iusspavia.it](mailto:ruifigueiredo@iusspavia.it))

- [nhess-18-1297-2018-supplement-title-page.pdf](#)
- [caldogno\\_losses.csv](#)
- [mulde\\_losses.csv](#)

The copyright of individual parts of the supplement might differ from the CC BY 4.0 License.
